# Supplementary material for: Dumbbell-like polyionic complexes of dendronized poly(ethylene glycol): synthesis and self-assembly studies
Source: Royal Society of Chemistry journal article supplement (doi:10.1039/d2py01299e), 2023-01-01
Supplement: d2py01299e1.pdf [file d2py01299e1.pdf]

Supporting information

**The dumbbell-like polyionic complexes of dendronized poly(ethylene glycol): synthesis and self-assembly studies**

S.V. Khatuntsev<sup>1</sup>, A.A. Fanova<sup>3</sup>, P.A. Fetin<sup>1</sup>, L.I. Kaberov<sup>4,5</sup>, N.V. Girbasova<sup>1</sup>, I.M. Zorin<sup>1</sup>, A.A. Lezov<sup>2</sup>, A.Yu. Bilibin<sup>1</sup>

<sup>1</sup>Institute of Chemistry, St. Petersburg State University, Universitetskaya nab. 7/9, 199034, St. Petersburg, Russian Federation

<sup>2</sup>Department of Molecular Biophysics and Polymer Physics, Physical Faculty, St. Petersburg State University, Universitetskaya nab. 7/9, 199034, St. Petersburg, Russian Federation

<sup>3</sup>Department of Physical and Macromolecular Chemistry, Faculty of Science, Charles University, Hlavova 2030, 12840 Prague 2, Czech Republic

<sup>4</sup>Institute of Organic Chemistry and Macromolecular Chemistry (IOMC), Friedrich Schiller University Jena, D-07743 Jena, Germany

<sup>5</sup>Jena Center for Soft Matter (JCSM), Friedrich Schiller University Jena, D-07743, Jena, Germany

[p.fetin@spbu.ru](mailto:p.fetin@spbu.ru)

[leonid.kaberov@uni-jena.de](mailto:leonid.kaberov@uni-jena.de)

[i.zorin@spbu.ru](mailto:i.zorin@spbu.ru)

## Contents

|                                                                                                                                               |    |
|-----------------------------------------------------------------------------------------------------------------------------------------------|----|
| Figure S1. <sup>1</sup> H NMR spectrum of <i>N</i> -acryloyldimethyl asparaginate (DMA) in CDCl <sub>3</sub> . .....                          | 3  |
| Figure S2. <sup>1</sup> H NMR spectrum of poly(ethylene glycol)- <i>bis</i> -tosylate in CDCl <sub>3</sub> . .....                            | 3  |
| Figure S3. <sup>1</sup> H NMR spectrum of poly(ethylene glycol)- <i>bis</i> -amine in CDCl <sub>3</sub> . .....                               | 4  |
| Figure S4. <sup>1</sup> H NMR spectrum of PEG-DMA in CDCl <sub>3</sub> . .....                                                                | 4  |
| Figure S5. <sup>1</sup> H NMR spectrum of PEG-Asp-EDA in DMSO-d <sub>6</sub> . .....                                                          | 5  |
| Figure S6. <sup>1</sup> H NMR spectrum of PEG-Asp in DMSO-d <sub>6</sub> . .....                                                              | 5  |
| Figure S7. <sup>1</sup> H NMR spectrum of Complex 1 in DMSO-d <sub>6</sub> . .....                                                            | 6  |
| Figure S8. <sup>1</sup> H NMR spectrum of dimethyl-(4- <i>N</i> -acryloyl)aminobenzoyl aspartate in CDCl <sub>3</sub> . .....                 | 6  |
| Figure S9. <sup>1</sup> H NMR spectrum of PEG-B-DMA in CDCl <sub>3</sub> . .....                                                              | 7  |
| Figure S10. <sup>1</sup> H NMR spectrum of PEG-B-Asp-EDA in CDCl <sub>3</sub> . .....                                                         | 7  |
| Figure S11. <sup>1</sup> H NMR spectrum of PEG-B-Asp in DMSO-d <sub>6</sub> . .....                                                           | 8  |
| Figure S12. <sup>1</sup> H NMR spectrum of PEG-Asp-GMDA in CDCl <sub>3</sub> . .....                                                          | 8  |
| Figure S13. IR spectrum of amino- component (PEG-Asp-EDA) of Complex 1. ....                                                                  | 9  |
| Figure S14. IR spectrum of carboxyl component (PEG-Asp) of Complex 1. ....                                                                    | 9  |
| Figure S15. IR spectrum of Complex 1 formed from carboxyl components (PEG-Asp) and amino- component (PEG-Asp-EDA) .....                       | 10 |
| Figure S16. The distribution functions of R <sub>h</sub> for PEG-Asp-GMDA and Complex 3 in water. ....                                        | 10 |
| Figure S17. The thermogram of Complex 1 obtained from chloroform. ....                                                                        | 11 |
| Figure S18. The SWAXS spectra of Complex 1 obtained from water (A) and from methanol (B). For measurement, the sample was fixed on tape. .... | 12 |

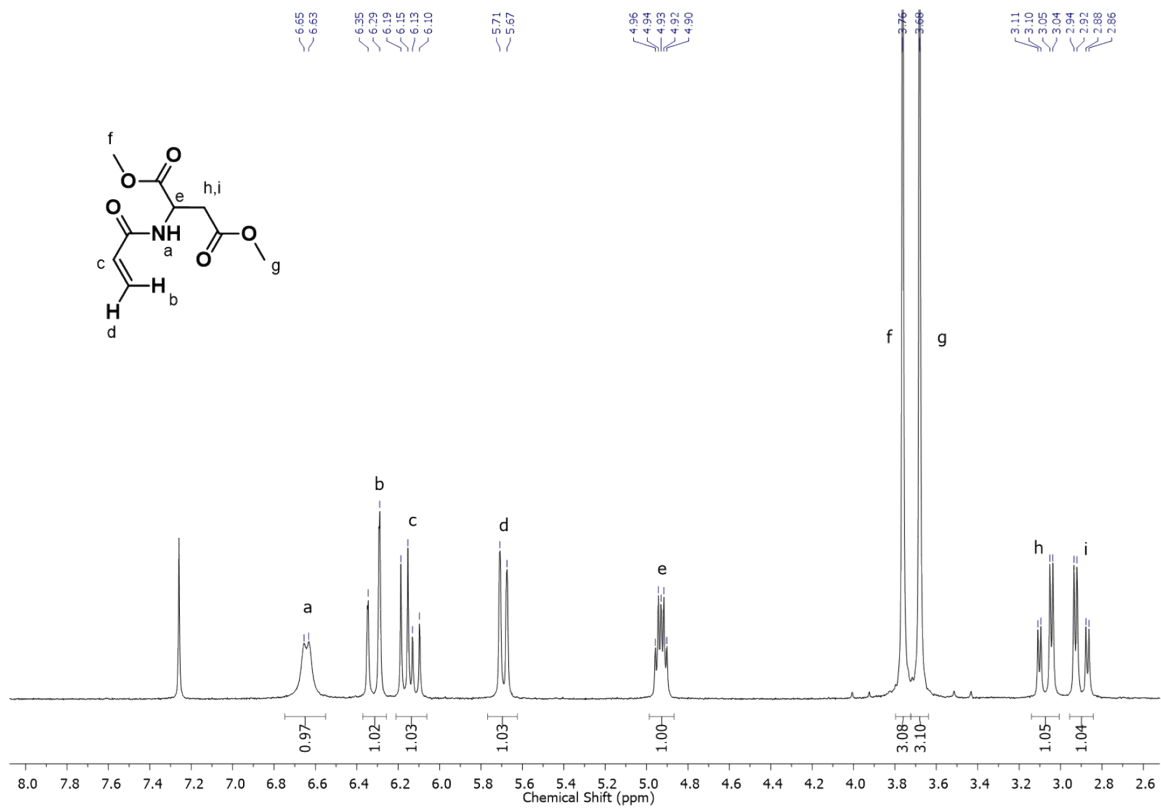

Figure S1. <sup>1</sup>H NMR spectrum of *N*-acryloyldimethyl asparaginate (DMA) in CDCl<sub>3</sub>.

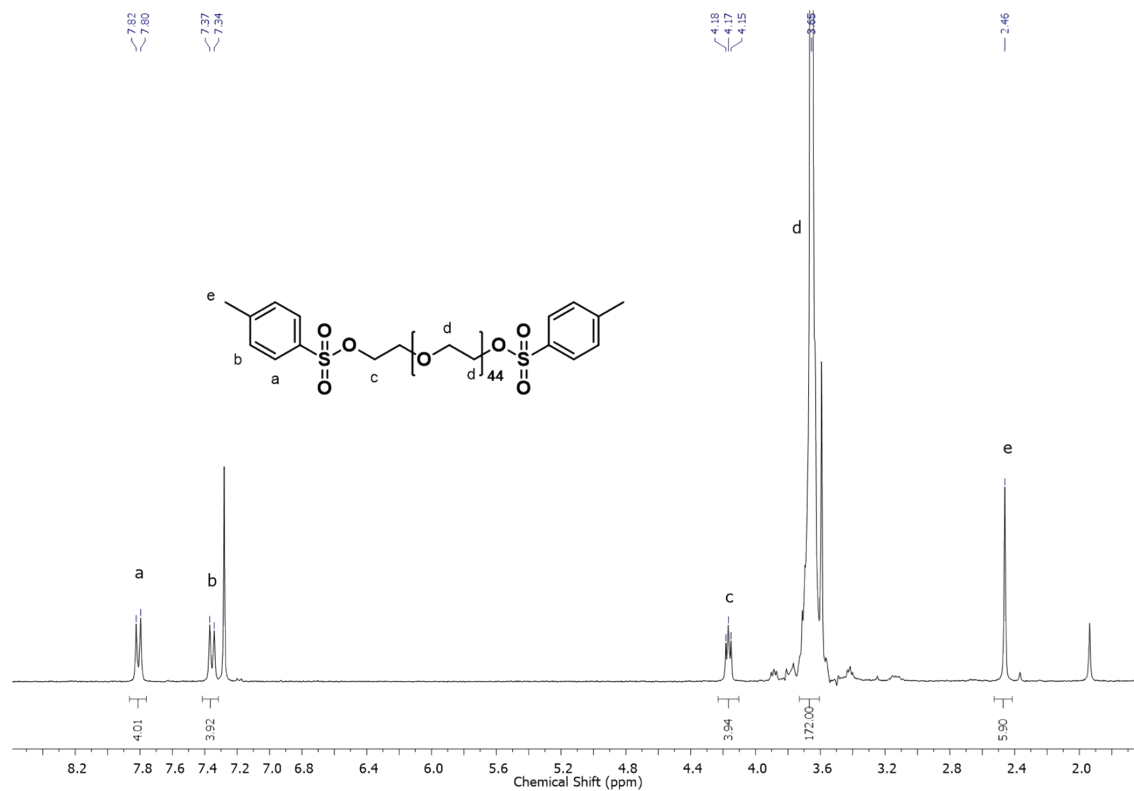

Figure S2. <sup>1</sup>H NMR spectrum of poly(ethylene glycol)-bis-tosylate in CDCl<sub>3</sub>.

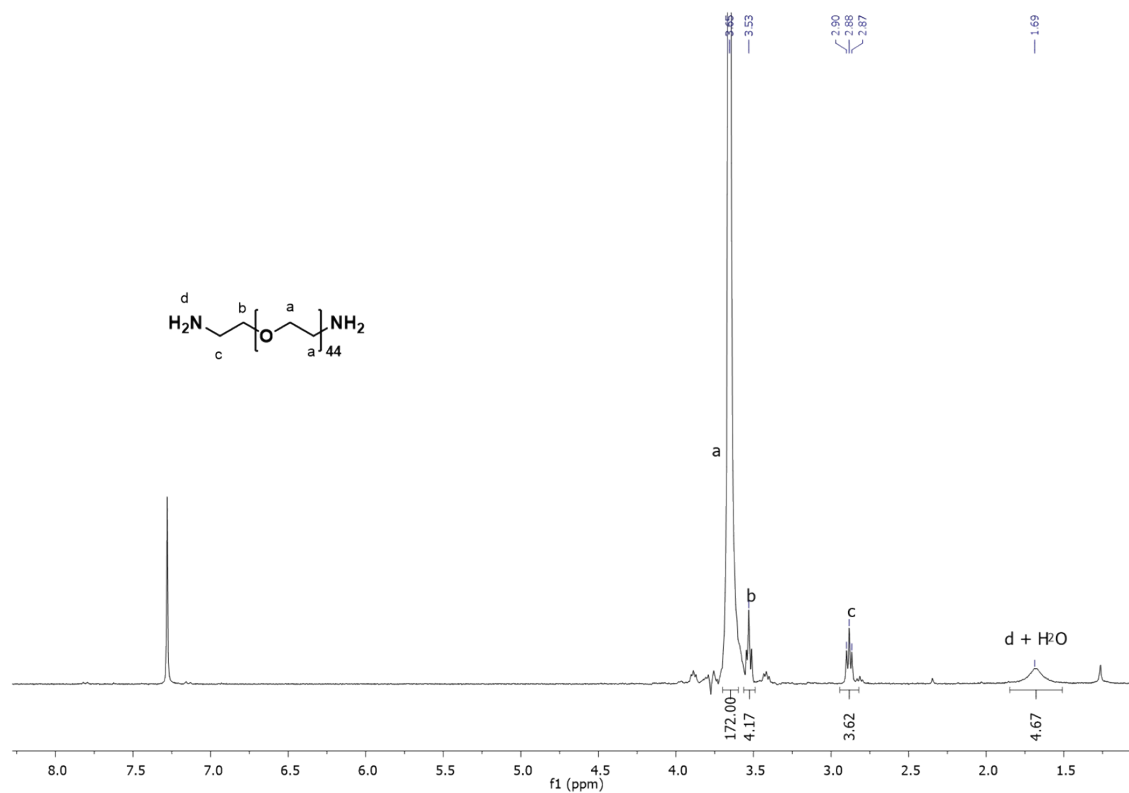

Figure S3. <sup>1</sup>H NMR spectrum of poly(ethelene glycol)-bis-amine in CDCl<sub>3</sub>.

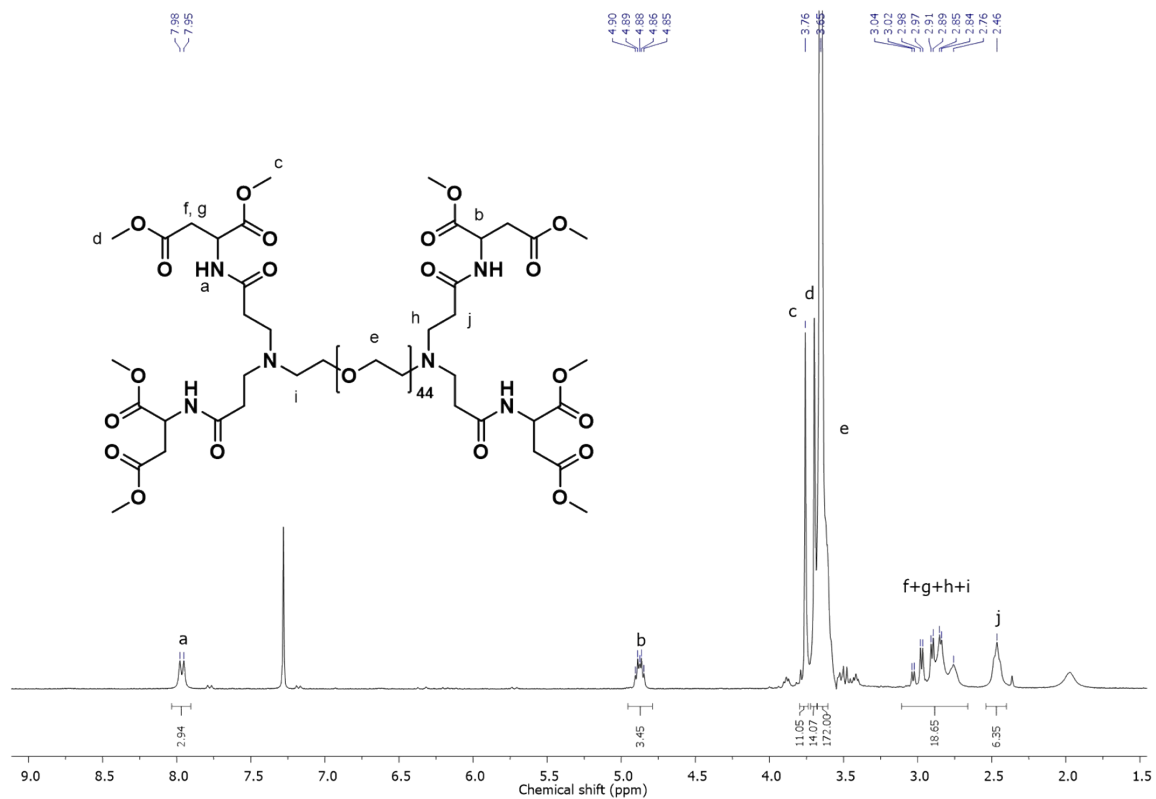

Figure S4. <sup>1</sup>H NMR spectrum of PEG-DMA in CDCl<sub>3</sub>.

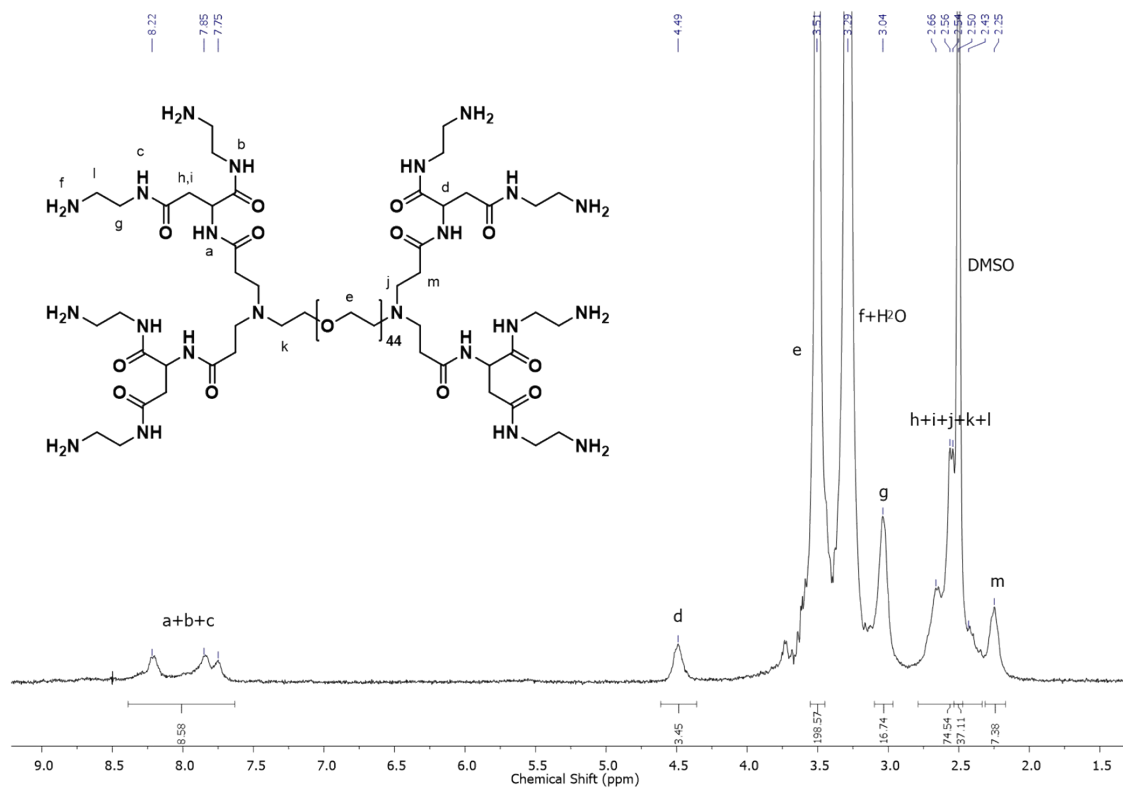

Figure S5. <sup>1</sup>H NMR spectrum of PEG-Asp-EDA in DMSO-d<sub>6</sub>.

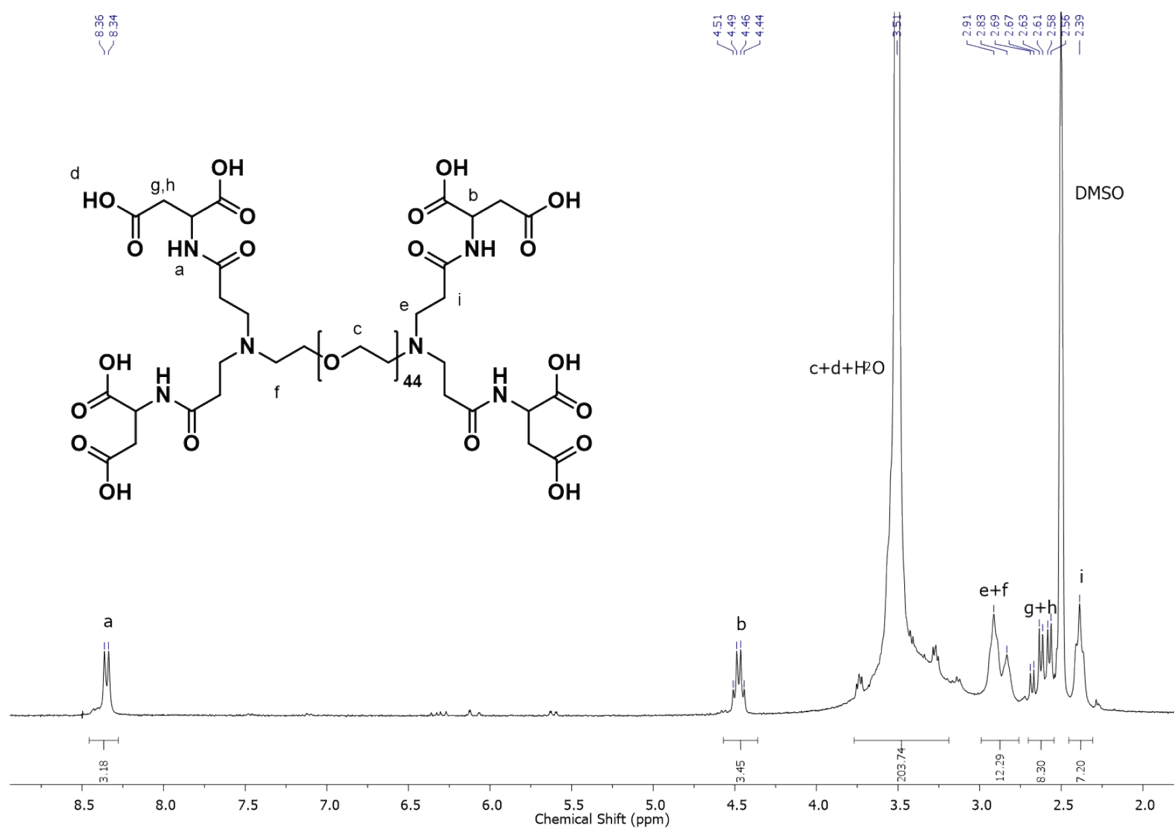

Figure S6. <sup>1</sup>H NMR spectrum of PEG-Asp in DMSO-d<sub>6</sub>.

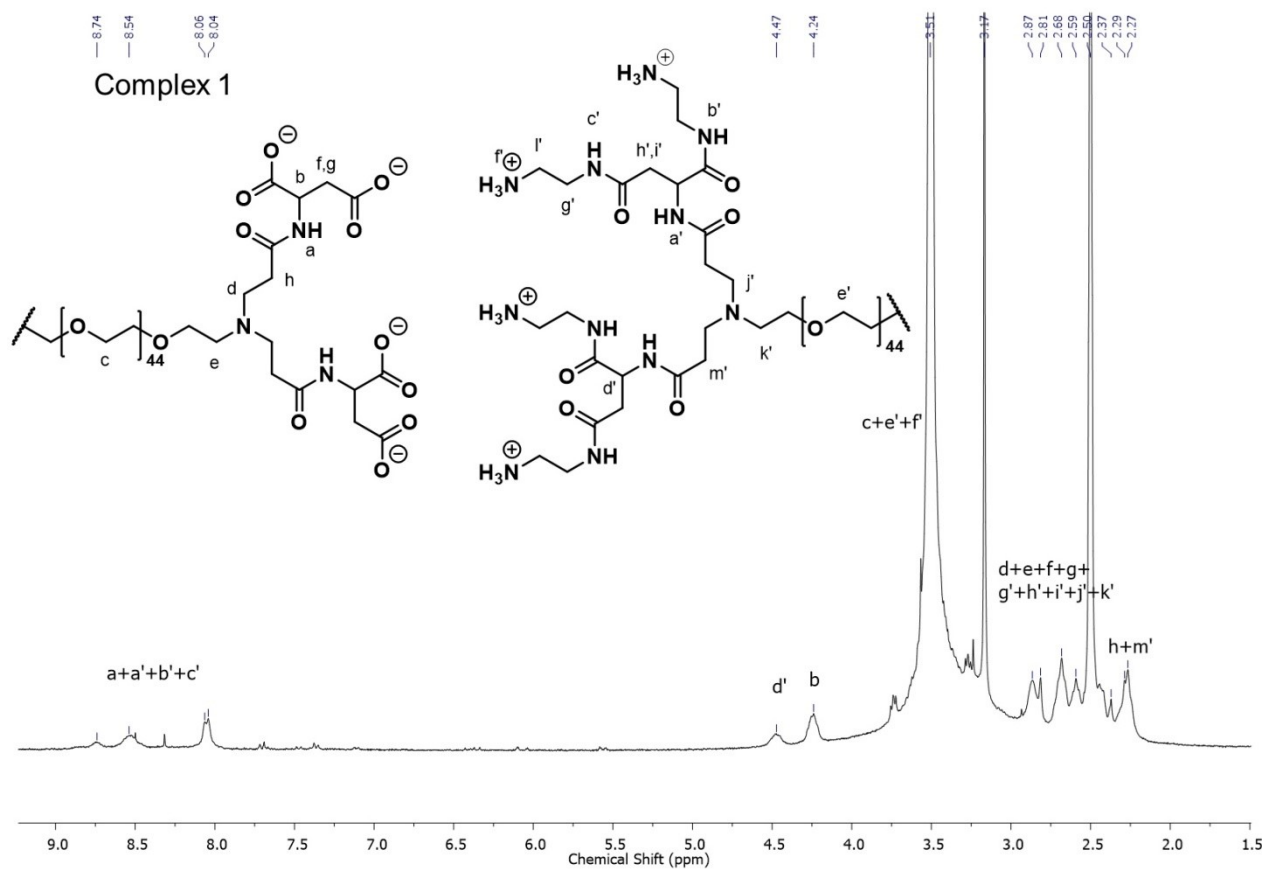

Figure S7.  $^1\text{H}$  NMR spectrum of Complex 1 in DMSO- $d_6$ .

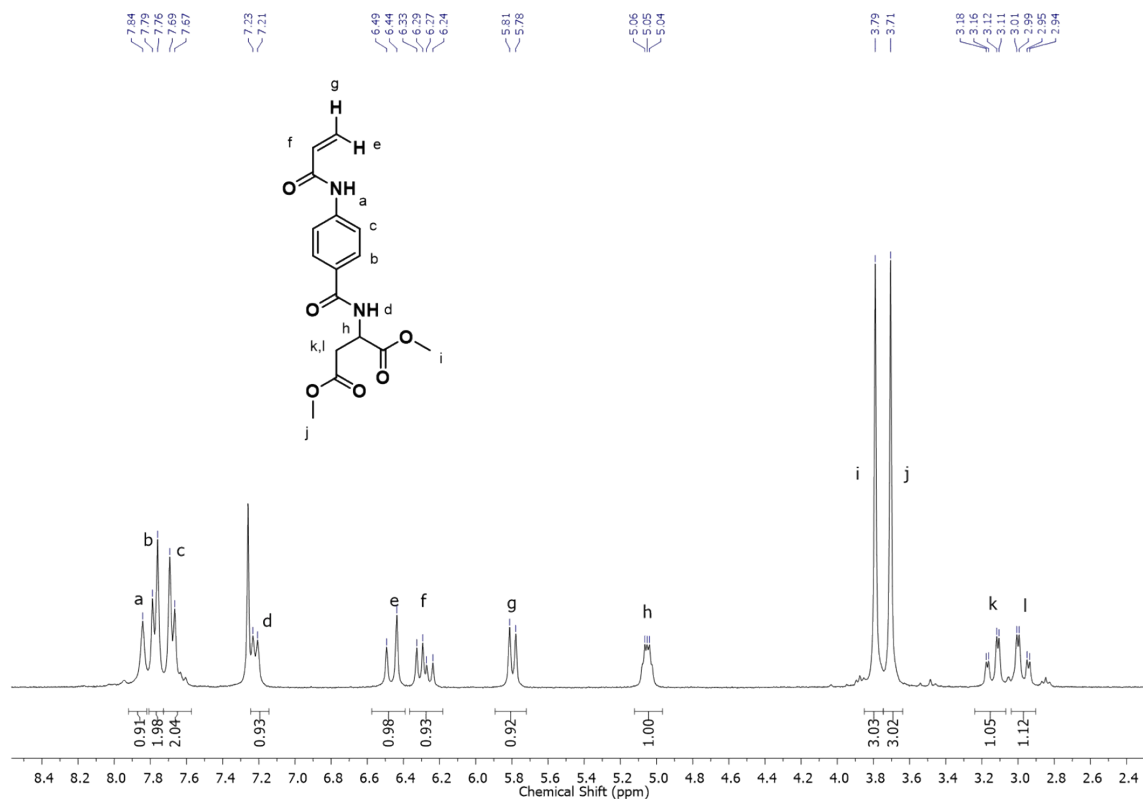

Figure S8.  $^1\text{H}$  NMR spectrum of dimethyl-(4-*N*-acryloyl)aminobenzoyl aspartate in  $\text{CDCl}_3$ .

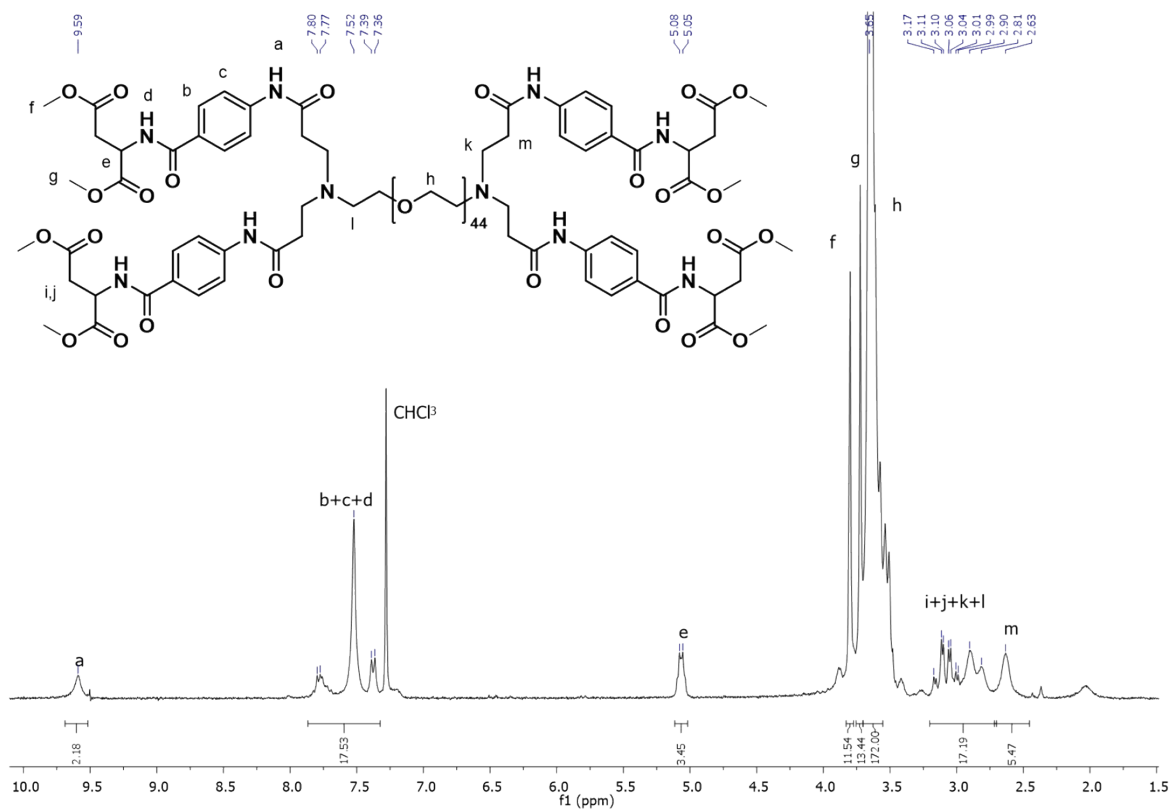

Figure S9.  $^1\text{H}$  NMR spectrum of PEG-B-DMA in  $\text{CDCl}_3$ .

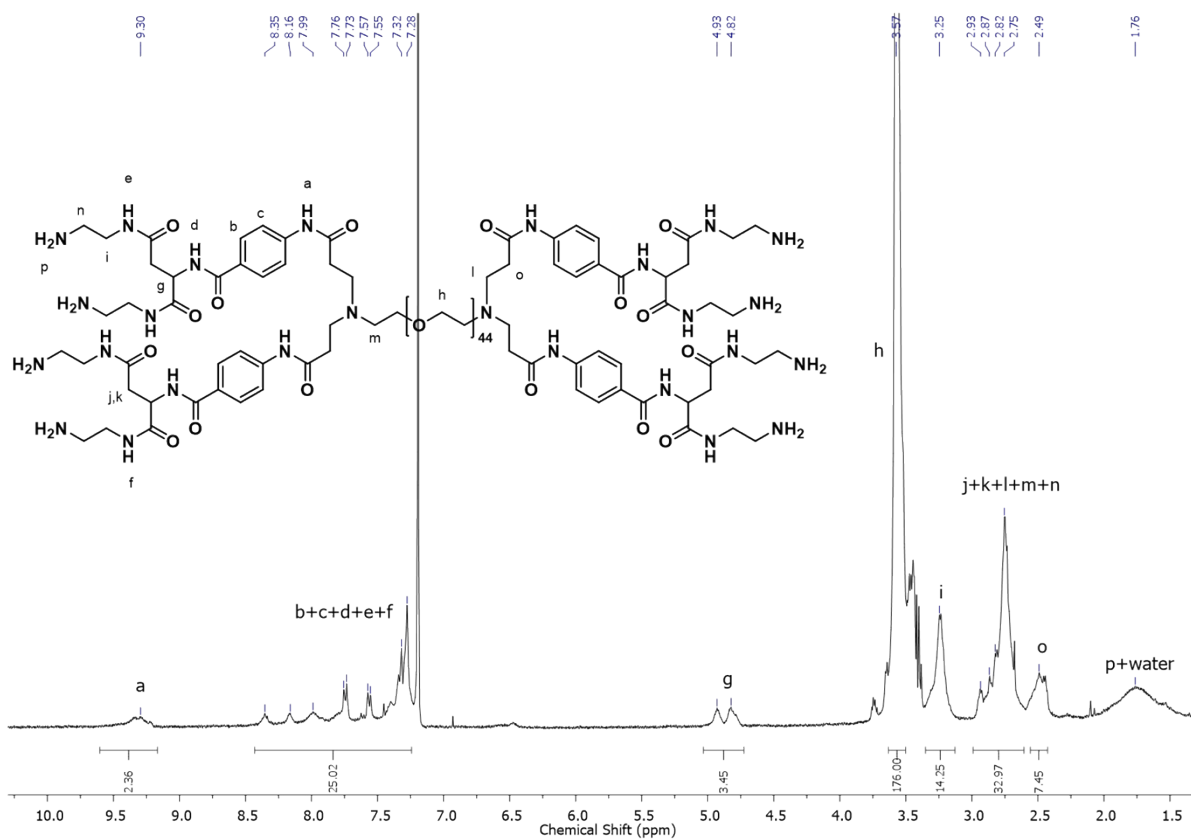

Figure S10.  $^1\text{H}$  NMR spectrum of PEG-B-Asp-EDA in  $\text{CDCl}_3$ .

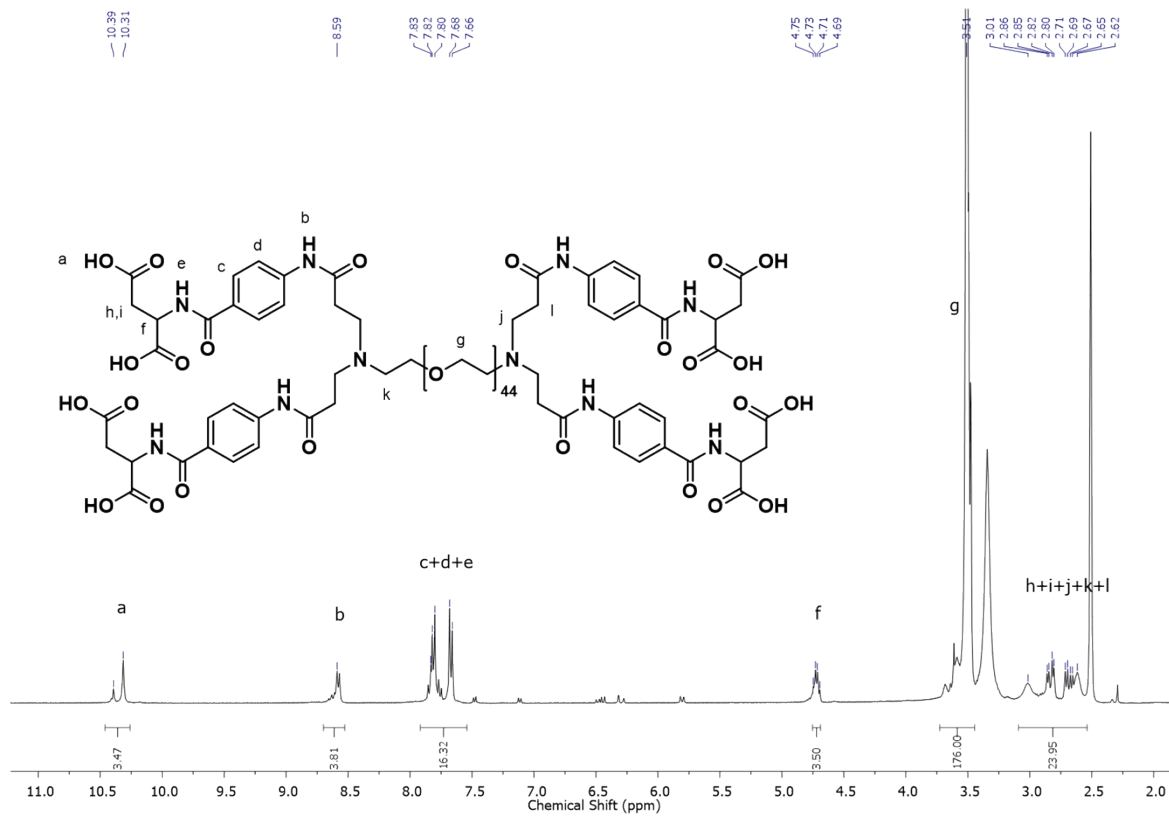

Figure S11.  $^1\text{H}$  NMR spectrum of PEG-B-Asp in  $\text{DMSO-d}_6$ .

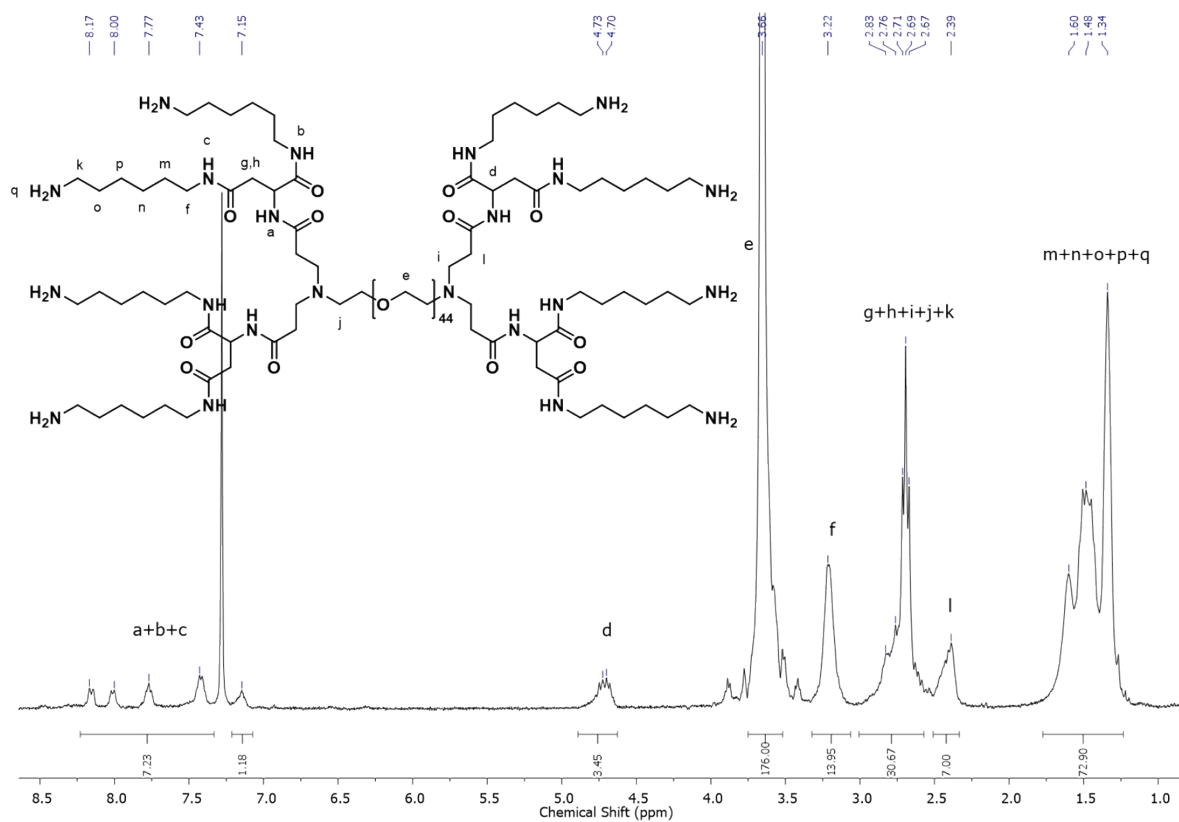

Figure S12.  $^1\text{H}$  NMR spectrum of PEG-Asp-GMDA in  $\text{CDCl}_3$ .



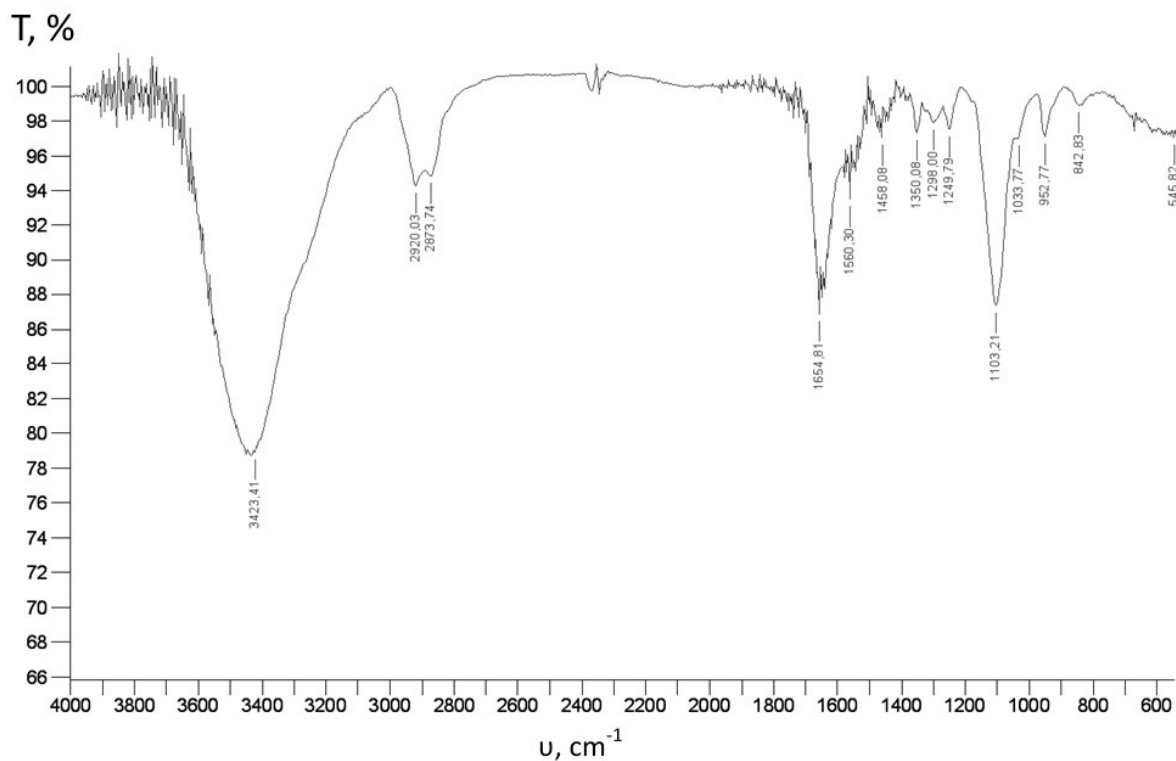

Figure S13. IR spectrum of amino- component (PEG-Asp-EDA) of Complex 1, T,% - transmission,  $\nu$ ,  $\text{cm}^{-1}$  - wave number.

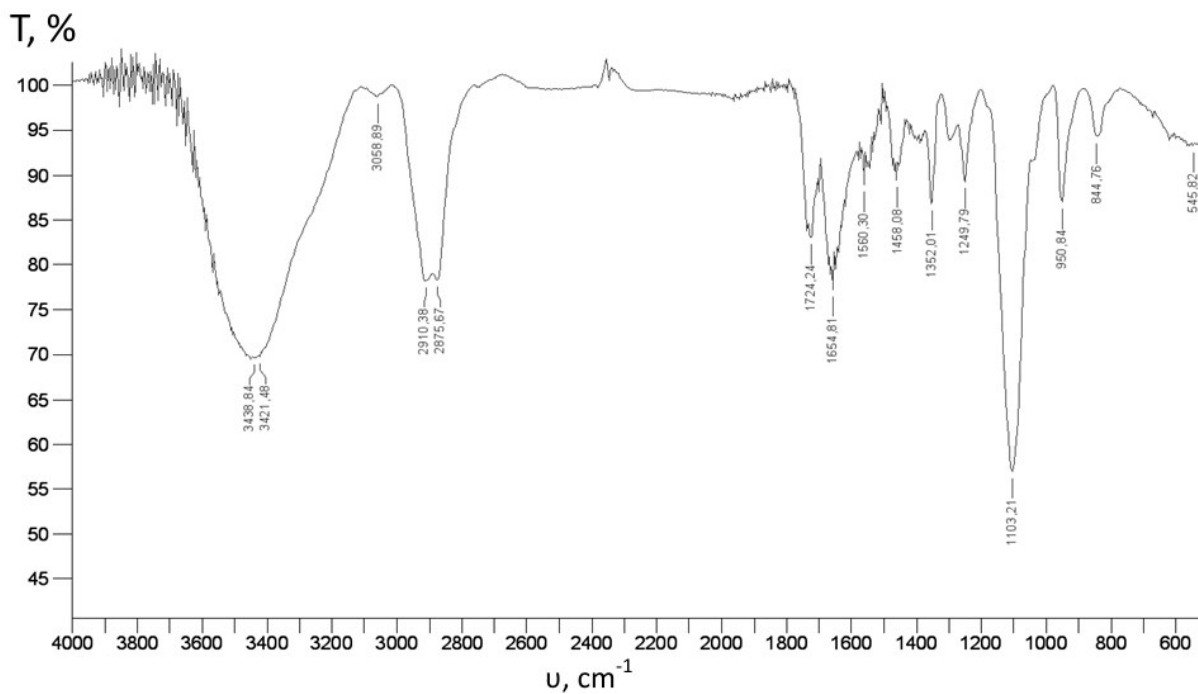

Figure S14. IR spectrum of carboxyl component (PEG-Asp) of Complex 1, T,% - transmission,  $\nu$ ,  $\text{cm}^{-1}$  - wave number.

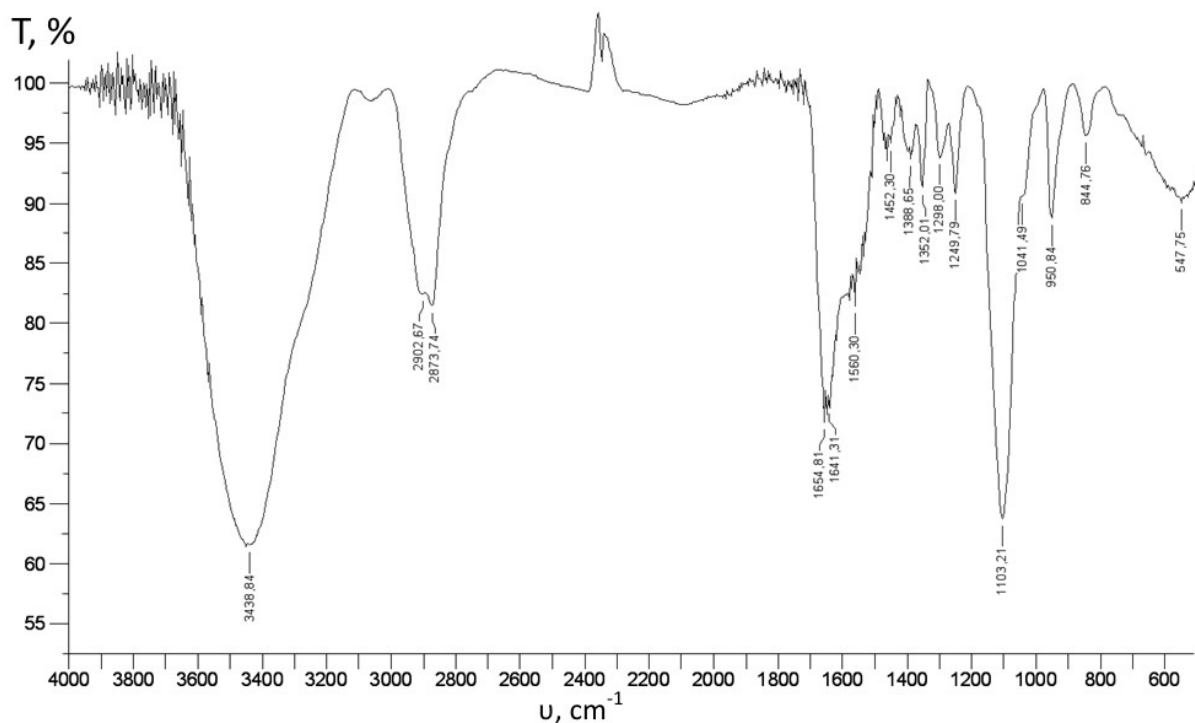

Figure S15. IR spectrum of Complex 1 formed from carboxyl components (PEG-Asp) and amino- component (PEG-Asp-EDA), T,% - transmission,  $\nu$ ,  $\text{cm}^{-1}$  - wave number.

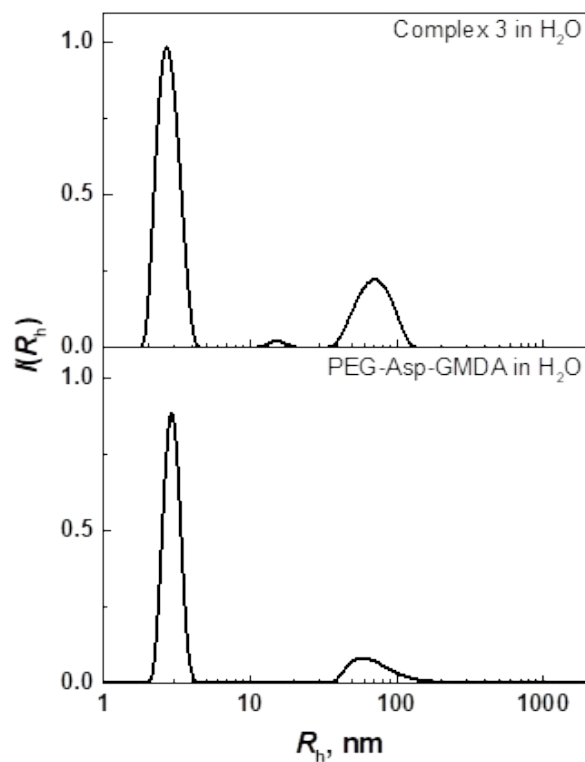

Figure S16. The distribution functions of  $R_h$  for PEG-Asp-GMDA and Complex 3 in water.

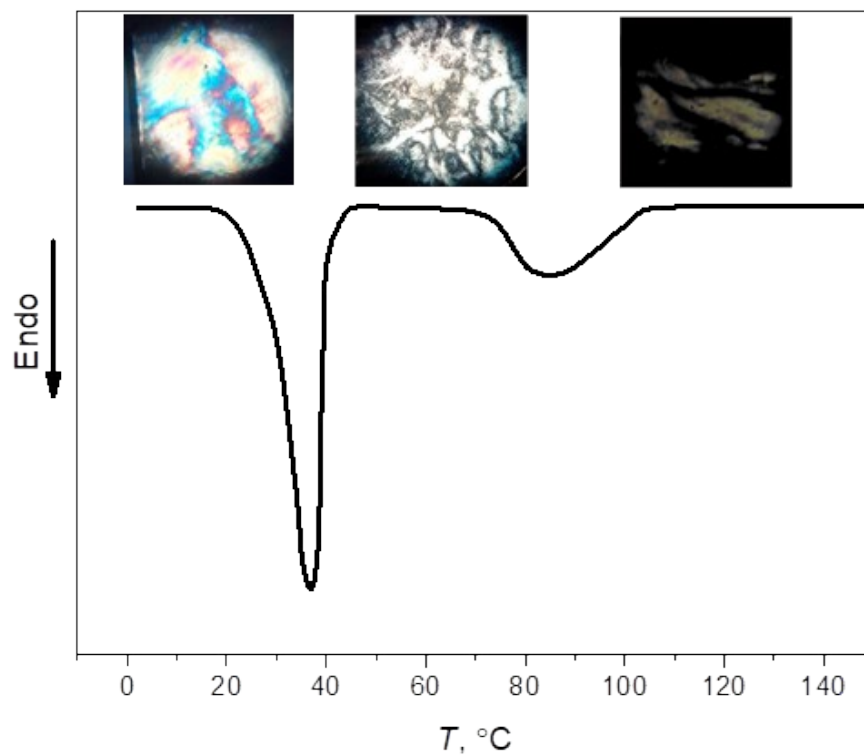

Figure S17. The thermogram of Complex 1 obtained from chloroform. The insets show POM images of the complex at different temperatures in crossed polarizers.

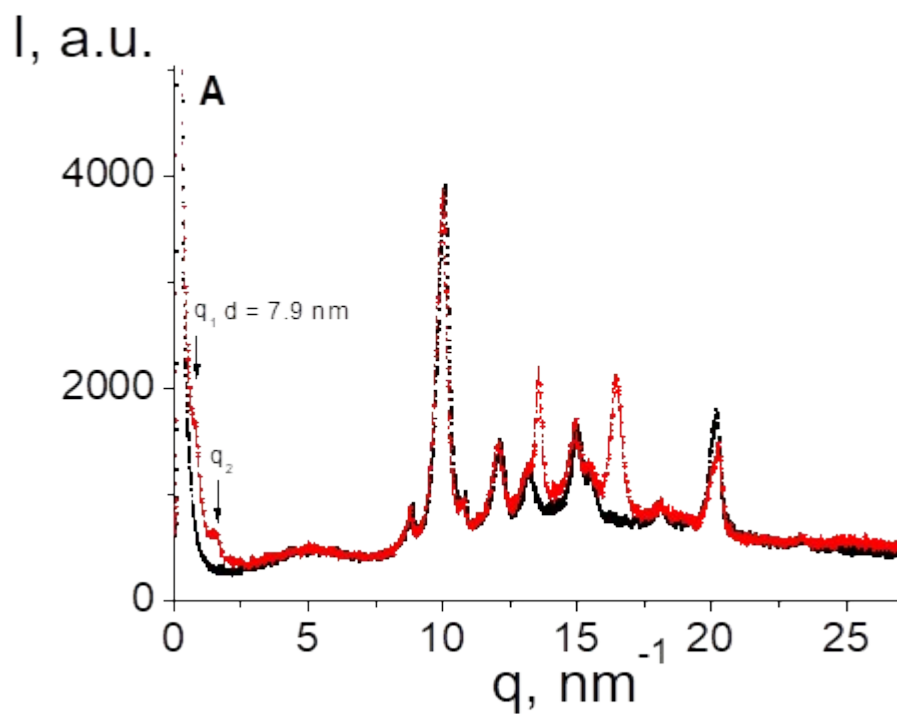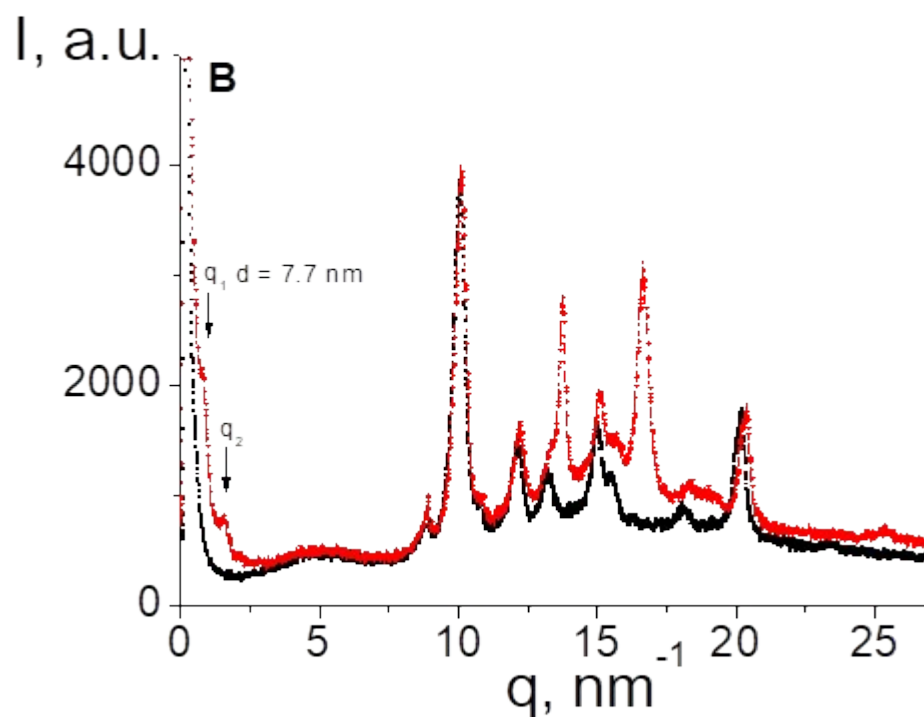

Figure S18. The SWAXS spectra of Complex 1 obtained from water (A) and from methanol (B). For measurement, the sample was fixed on tape. The SWAXS spectra of tape are represented by black dots, Complex 1 spectrum – red dots.
